# Supplementary material
Source: PubMed Central journal article supplement (PMC3887868)
Supplement: molcell-35-5-410-7-supplementary.pdf [file molcell-35-5-410-7-supplementary.pdf]

- **Supplementary Fig. S1.** Cell proliferation activity of quercetin and structurally related compounds in macrophages. RAW264.7 cells were cultured with various concentrations of each compound for 24 h. Cell proliferation was measured using EZ-CyTox Enhanced Cell Viability Assay Kit and is represented as control % compared with that of DMSO-treated group. Results are shown as the mean  $\pm$  SEM of three independent experiments.
- 
- **Supplementary Fig. S2.** Effects of quercetin and structurally related compounds on zymosan-induced SRE and NFAT signaling. RAW264.7 cells were transiently transfected with pCRE-SEAP (A) or pAP-1-SEAP (B) plasmid for 24 h, and SEAP expression was measured with cultured supernatants. Results are represented as inhibition % and shown as the mean  $\pm$  SEM of three independent experiments.

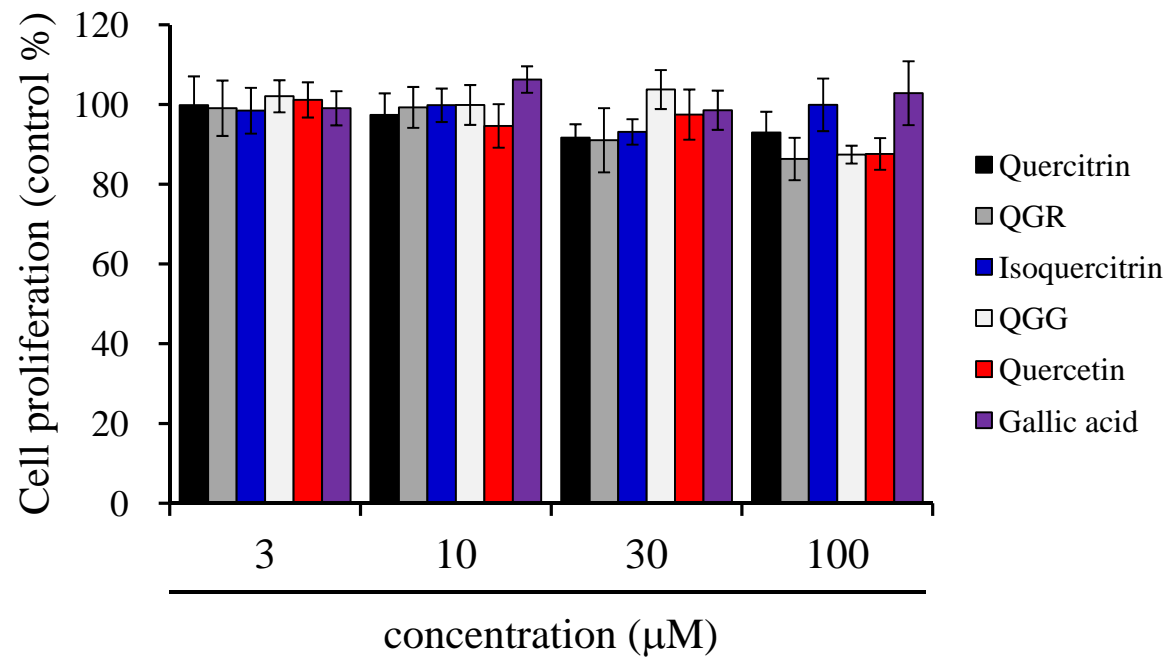

**Supplementary Figure S1.**

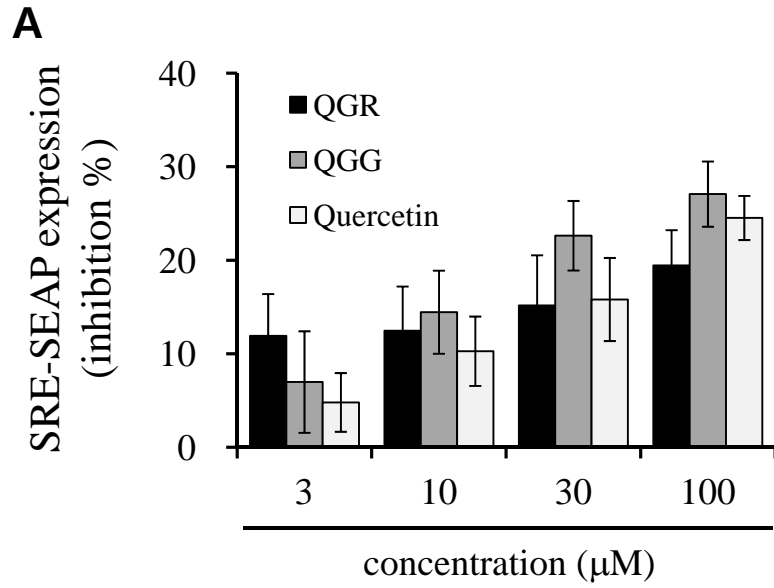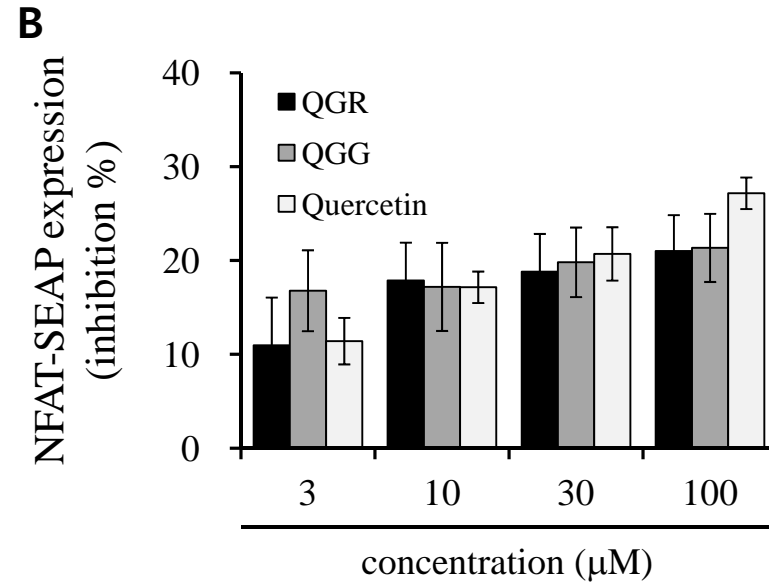

**Supplementary Figure S2.**
